# Supplementary material
Source: Elsevier journal article supplement (https://www.sciencedirect.com/science/article/pii/S0211139X22000026)
Supplement: mmc1 [file S0211139X22000026:mmc1.doc]

Anexo. Puntos clave

**PUNTOS CLAVE**

- La validación de instrumentos de medida es un proceso continuo, que se puede realizar de diferentes formas. Se estudió la validez convergente y discriminativa del índice Frágil-VIG respecto a la escala Braden de valoración de riesgo de desarrollar lesiones relacionadas con la dependencia.
- El índice Frágil-VIG demostró validez convergente con la escala de Braden y los puntajes del índice Frágil-VIG mostraron una excelente capacidad para diferenciar entre personas mayores con menor y mayor riesgo de desarrollar úlceras por presión. Estos hallazgos proporcionan pruebas adicionales para la validez de constructo del índice Frágil-VIG.
- El índice Frágil-VIG puede ser un instrumento útil en atención domiciliaria. Permite realizar una aproximación rápida y estandarizada de la valoración geriátrica integral y cuantificar el grado de fragilidad de la persona, sirviendo de apoyo para la estratificación, toma de decisiones y planificación de actividades
